# Supplementary material for: Monitoring of Fabric Integrity and Attrition Rate of Dual-Active Ingredient Long-Lasting Insecticidal Nets in Tanzania: A Prospective Cohort Study Nested in a Cluster Randomized Controlled Trial
Source: MDPI journal article supplement (doi:10.3390/insects15020108), 2024-02-04
Supplement: s1 [file s1]

## Supplementary materials

Table S1: pHI categories as per WHO guideline 2013.

| Category | pHI value range | Total hole surface area in cm² |
|----------|-----------------|--------------------------------|
| Good     | 0-64            | <100                           |
| Damage   | 65 – 642        | 100 – 1,000                    |
| Too torn | 643+            | >1,000                         |

Table S2: Reason for attrition per net type and net age

|                        |     | Interceptor® %<br>(95%CI) | Interceptor® G2 %<br>(95%CI) | Olyset™ Plus %<br>(95%CI) | Royal Guard® %<br>(95%CI) |
|------------------------|-----|---------------------------|------------------------------|---------------------------|---------------------------|
| Thrown away            | 6M  | 11% (3 - 29)              | 33% (20 - 48)                | 69% (59 - 77)             | 30% (19 - 44)             |
|                        | 12M | 31% (22 - 41)             | 66% (58 - 73)                | 66% (60 - 72)             | 39% (31 - 47)             |
|                        | 24M | 64% (59 - 70)             | 66% (61 - 71)                | 87% (84 - 89)             | 74% (70 - 78)             |
|                        | 30M | 73% (68 - 78)             | 81% (77 - 85)                | 86% (83 - 89)             | 82% (78 - 85)             |
|                        | 36M | 79% (75 - 83)             | 87% (83 - 90)                | 90% (87 - 92)             | 90% (87 - 92)             |
| Used for other purpose | 6M  | 4% (0 - 22)               | 7% (2 - 20)                  | 6% (3 - 12)               | 4% (0 - 14)               |
|                        | 12M | 11% (6 - 19)              | 4% (2 - 9)                   | 9% (6 - 14)               | 8% (5 - 14)               |
|                        | 24M | 7% (4 - 10)               | 2% (1 - 4)                   | 2% (1 - 4)                | 1% (0 - 3)                |
|                        | 30M | 6% (4 - 10)               | 1% (0 - 3)                   | 4% (3 - 6)                | 2% (1 - 4)                |
|                        | 36M | 8% (6 - 11)               | 0                            | 2% (1 - 4)                | 2% (1 - 4)                |
| used in other location | 6M  | 43% (26 - 61)             | 26% (15 - 41)                | 12% (7 - 19)              | 42% (29 - 55)             |
|                        | 12M | 32% (23 - 42)             | 10% (6 - 15)                 | 8% (5 - 12)               | 23% (17 - 31)             |
|                        | 24M | 14% (11 - 19)             | 10% (7 - 14)                 | 5% (4 - 7)                | 9% (7 - 12)               |
|                        | 30M | 8% (6 - 12)               | 3% (1 - 5)                   | 2% (0 - 3)                | 5% (3 - 8)                |
|                        | 36M | 3% (2 - 5)                | 4% (2 - 6)                   | 3% (1 - 4)                | 2% (1 - 4)                |

|                         |     |               |               |              |               |
|-------------------------|-----|---------------|---------------|--------------|---------------|
|                         |     |               |               |              |               |
| Given away to relatives | 6M  | 39% (23 - 58) | 33% (20 - 49) | 7% (3 - 14)  | 15% (8 - 27)  |
|                         | 12M | 18% (11 - 27) | 13% (8 - 19)  | 10% (6 - 14) | 16% (10 - 22) |
|                         | 24M | 9% (6 - 13)   | 9% (7 - 13)   | 2% (1 - 4)   | 2% (1 - 4)    |
|                         | 30M | 5% (3 - 7)    | 6% (4 - 9)    | 2% (1 - 4)   | 4% (2 - 6)    |
|                         | 36M | 3% (2 - 5)    | 3% (1 - 5)    | 0            | 2% (1 - 4)    |
|                         |     |               |               |              |               |
| Destroyed accidentally  | 6M  | 0             | 2% (0 - 15)   | 5% (2 - 11)  | 4% (0 - 14)   |
|                         | 12M | 3% (1 - 10)   | 3% (1 - 8)    | 5% (3 - 9)   | 11% (7 - 9)   |
|                         | 24M | 3% (1 - 5)    | 7% (5 - 11)   | 2% (1 - 4)   | 11% (8 - 14)  |
|                         | 30M | 2% (1 - 4)    | 6% (4 - 9)    | 2% (1 - 3)   | 5% (3 - 7)    |
|                         | 36M | 1% (0 - 3)    | 4% (2 - 6)    | 2% (1 - 4)   | 2% (1 - 4)    |
|                         |     |               |               |              |               |
| Stolen                  | 6M  | 4% (0 - 22)   | 0             | 2% (0 - 7)   | 4% (0 - 14)   |
|                         | 12M | 3% (1 - 10)   | 2% (0 - 6)    | 1% (0 - 4)   | 1% (0 - 5)    |
|                         | 24M | 2% (0 - 4)    | 2% (0 - 4)    | 1% (0 - 2)   | 2% (0 - 3)    |
|                         | 30M | 3% (2 - 6)    | 2% (1 - 4)    | 3% (2 - 5)   | 1% (0 - 3)    |
|                         | 36M | 3% (2 - 6)    | 2% (0 - 4)    | 3% (2 - 5)   | 0             |

Table S3a: Survivorship of the LLIN per time point

| Net type        | % Survival, 95%CI |                 |                 |                 |                 |
|-----------------|-------------------|-----------------|-----------------|-----------------|-----------------|
|                 | 6month            | 12month         | 24month         | 30month         | 36month         |
| Interceptor®    | 93.7% [91 - 95]   | 84.0% [81 - 87] | 59.4% [56 - 63] | 47.2% [43 - 52] | 37.1% [33 - 41] |
| Interceptor® G2 | 90.9% [88 - 93]   | 78.9% [76 - 82] | 56.8% [53 - 60] | 42.0% [38 - 46] | 36.7% [33 - 41] |
| Olyset™ Plus    | 82.1% [79 - 85]   | 49.2% [46 - 52] | 18.1% [15 - 21] | 14.8% [12 - 18] | 9.5% [7 - 12]   |
| Royal Guard®    | 89.9% [87 - 92]   | 70.1% [67 - 73] | 39.9% [37 - 44] | 27.4% [24 - 31] | 18.0% [15 - 21] |

Table S3b: Functional survival of the LLIN per time point

| Net type        | % function survival, 95%CI |                 |                 |                 |                 |
|-----------------|----------------------------|-----------------|-----------------|-----------------|-----------------|
|                 | 6month                     | 12month         | 24month         | 30month         | 36month         |
| Interceptor®    | 91.7% [88 - 94]            | 76.7% [73 - 80] | 44.3% [40 - 48] | 30.5% [27 - 34] | 21.8% [19 - 25] |
| Interceptor® G2 | 88.5% [85 - 91]            | 63.2% [59 - 67] | 39.9% [36 - 44] | 23.1% [20 - 27] | 19.7% [16 - 23] |
| Olyset™ Plus    | 62.6% [58 - 67]            | 29.4% [26 - 33] | 8.3% [6 - 11]   | 3.2% [2 - 5]    | 3.9% [3 - 6]    |
| Royal Guard®    | 88.6% [85 - 91]            | 62.2% [58 - 66] | 29.9% [26 - 34] | 15.4% [13 - 19] | 8.6% [7 - 11]   |

Figure S4: Proportion of nets with at least one hole per survey

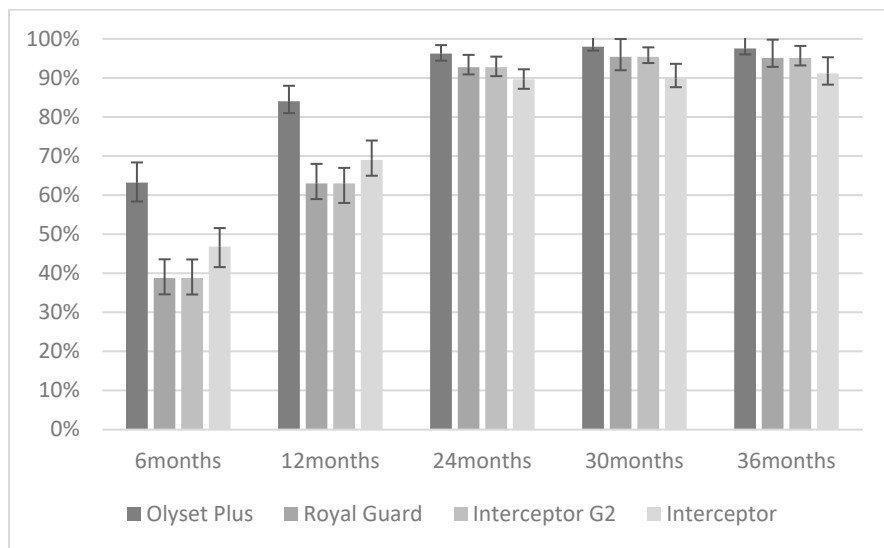

Malaria Prevention Trial: Misungwi (MRC/WT/DFID)

Household questionnaire Survey for Phase III study (English) v2.0 09/03/2019

|                      |           |  |  |
|----------------------|-----------|--|--|
| Date (dd/mm/yy)      | __/__/__  |  |  |
| Interviewer Initials | ____      |  |  |
| Identification       |           |  |  |
| Hamlet Code          | __ __ __  |  |  |
| Ward name            |           |  |  |
| Village Name         |           |  |  |
| Hamlet Name          |           |  |  |
| Cluster Number       | ____ ____ |  |  |

|                                 |                                         |  |  |
|---------------------------------|-----------------------------------------|--|--|
| Household number/Unique address | ____   ____   ____   ____   ____   ____ |  |  |
|---------------------------------|-----------------------------------------|--|--|

| Interview Information  |                                     |        |  |
|------------------------|-------------------------------------|--------|--|
| Question description   | Options                             | Answer |  |
| Consent result         | Consent given                       | 1      |  |
|                        | Ineligible (no children under 15)   | 2      |  |
|                        | Return later                        | 3      |  |
|                        | Refused                             | 4      |  |
|                        | Dwelling vacant for survey duration | 5      |  |
|                        | Dwelling not found                  | 6      |  |
|                        | Dwelling not visited                | 7      |  |
| Total number of visits | ____                                |        |  |
| Comments               |                                     |        |  |

| Socio Economical Status |                                                     |         |  |        |    |      |
|-------------------------|-----------------------------------------------------|---------|--|--------|----|------|
| No.                     | Question description                                | Options |  | Answer | If | Goto |
| 9                       | Has the head of the household ever attended school? | Yes     |  | 1      |    |      |
|                         |                                                     | No      |  | 0      | 0  | 11   |

|    |                                                                                                                               |                          |           |      |    |    |
|----|-------------------------------------------------------------------------------------------------------------------------------|--------------------------|-----------|------|----|----|
|    |                                                                                                                               | Don't Know               |           | 98   | 98 | 11 |
| 10 | What is the highest level of school the head of the household attended:                                                       | Primary                  |           | 1    |    |    |
|    |                                                                                                                               | Secondary/technic        |           | 2    |    |    |
|    |                                                                                                                               | Higher                   |           | 3    |    |    |
|    |                                                                                                                               | Don't Know               |           | 98   |    |    |
| 11 | Has the head of the household WIFE ever attended school?                                                                      | Yes                      |           | 1    |    |    |
|    |                                                                                                                               | No                       |           | 0    | 0  | 13 |
|    |                                                                                                                               | Not Applicable           |           | 2    | 2  | 13 |
|    |                                                                                                                               | Don't Know               |           | 98   | 98 | 13 |
| 12 | What is the highest level of school the head of the household WIFE attended:                                                  | Primary                  |           | 1    |    |    |
|    |                                                                                                                               | Secondary/technic        |           | 2    |    |    |
|    |                                                                                                                               | Higher                   |           | 3    |    |    |
|    |                                                                                                                               | Don't Know               |           | 98   |    |    |
| 13 | How many rooms are there in this household?<br>>>Include all structures (huts etc)                                            | Number (Don't Know = 98) |           | --   |    |    |
| 14 | How many rooms in this household are used for sleeping?                                                                       | Rooms number             |           | ____ |    |    |
| 15 | How many sleeping places are there in this household (beds, mattresses or mats)?<br>>>Ask for both inside the hut and outside | Number                   |           | --   |    |    |
| 16 | How many sleeping places were used last night?                                                                                |                          |           |      |    |    |
|    |                                                                                                                               |                          | Check box |      |    | 18 |
| 17 | What is the main material of the roof? (observe)                                                                              | Grass/Papyrus/leaves     |           | 1    |    |    |
|    |                                                                                                                               | Metal sheets             |           | 2    |    |    |

|     |                                                                            |                                    |   |   |     |
|-----|----------------------------------------------------------------------------|------------------------------------|---|---|-----|
|     |                                                                            | Metal sheets                       | 3 |   |     |
|     | (>>Multiple answers allowed)                                               | Other                              | 4 | 4 | 17b |
| 17b | If Other type of roof specify                                              | Free text                          |   |   |     |
| 18  | What is the main material of the floor? (>>Multiple answers allowed)       | Earth/sand                         | 1 | 1 | 19  |
|     |                                                                            | Cement                             | 2 | 2 |     |
|     |                                                                            | Tiles                              | 3 |   |     |
|     |                                                                            | Other                              | 4 | 4 | 18b |
| 18b | If Other type of floor specify                                             | Free text                          |   |   |     |
| 19  | What is the main material of the walls? (>>Multiple answers allowed)       | Grass/leaves                       | 1 | 1 | 20  |
|     |                                                                            | Mud                                | 2 |   |     |
|     |                                                                            | Burnt bricks                       | 3 |   |     |
|     |                                                                            | Unburnt bricks                     | 4 |   |     |
|     |                                                                            | Cement bricks                      | 5 |   |     |
|     |                                                                            | Other                              | 6 | 7 | 19b |
| 19b | If Other type of wall specify                                              | Free text                          |   |   |     |
| 20  | Are the walls plastered? (>>Multiple answers allowed)                      | Yes completely                     | 1 | 1 |     |
|     |                                                                            | Partially/damaged                  | 2 | 2 |     |
|     |                                                                            | No                                 | 0 | 0 |     |
| 21  | Are eaves open? (Is there a gap between the top of the wall and the roof?) | Yes                                | 1 | 1 |     |
|     |                                                                            | No                                 | 0 | 0 |     |
| 22  | Does the house have a ceiling?                                             | Intact                             | 1 | 1 |     |
|     |                                                                            | Damage/Partial/traditional         | 2 | 2 |     |
|     |                                                                            | No ceiling                         | 0 | 0 |     |
| 23  | Where does the Households main income come from?                           | Fishing/Farming/Selling cash crops | 1 | 1 | 24  |
|     |                                                                            | Mining                             | 2 | 2 |     |
|     |                                                                            | Buisness/Shop                      | 3 | 3 |     |
|     |                                                                            | Medical/Teacher/Goverment          | 4 | 4 |     |

|     |                                                                                                                 |                       |      |    |     |
|-----|-----------------------------------------------------------------------------------------------------------------|-----------------------|------|----|-----|
|     |                                                                                                                 | Other                 | 5    | 5  | 23b |
| 23b | If Other kind of income specify                                                                                 | Free text             |      |    |     |
| 24  | Does the household (any member) have any of the following (Multiple choices)                                    |                       | Yes  | No |     |
|     |                                                                                                                 | Electricity           | 1    | 0  |     |
|     |                                                                                                                 | Radio                 | 1    | 0  |     |
|     |                                                                                                                 | Mobile phone          | 1    | 0  |     |
|     |                                                                                                                 | Bicycle               | 1    | 0  |     |
|     |                                                                                                                 | Car, boat, motorbike  | 1    | 0  |     |
|     |                                                                                                                 | Sewing machine        | 1    | 0  |     |
|     |                                                                                                                 | Television            | 1    | 0  |     |
|     |                                                                                                                 | Livestock             | 1    | 0  | 1   |
| 25  | Number of animals the household owns?<br>>> write 000 if none<br>if don't know write 9999<br>(Multiple choices) | Poultry/birds         |      |    |     |
|     |                                                                                                                 | Goats and sheep       |      |    |     |
|     |                                                                                                                 | Pigs                  |      |    |     |
|     |                                                                                                                 | Cows/Donkeys          |      |    |     |
|     |                                                                                                                 | Other                 |      |    | 25a |
| 25a | Other specify                                                                                                   | Free text             |      |    |     |
| 25b | Are the goat/sheep or cows staying inside the house at night?                                                   | Yes                   | 1    |    |     |
|     |                                                                                                                 | No                    | 0    |    |     |
|     |                                                                                                                 | Don't Know            | 9999 |    |     |
| 26  | What is the main source of drinking water for members of your household? (choose only one)                      | Piped water           |      |    |     |
|     |                                                                                                                 | Piped into dwelling   | 1    |    |     |
|     |                                                                                                                 | Piped to yard/plot    | 2    |    |     |
|     |                                                                                                                 | Piped to neighbor     | 3    |    |     |
|     |                                                                                                                 | Public tap/stand pipe | 4    |    |     |
|     |                                                                                                                 | Dug well              |      |    |     |
|     |                                                                                                                 | Protected well        | 5    |    |     |



|     |                                                                                  |                                                                                                              |      |   |    |
|-----|----------------------------------------------------------------------------------|--------------------------------------------------------------------------------------------------------------|------|---|----|
|     |                                                                                  | Unprotected well                                                                                             | 6    |   |    |
|     |                                                                                  | Water From Spring                                                                                            | 7    |   |    |
|     |                                                                                  | Rainwater                                                                                                    | 8    |   |    |
|     |                                                                                  | Surface Water (River/Dam/Lake/Pond/Stream)                                                                   | 9    |   |    |
|     |                                                                                  | Other, Specify _____                                                                                         |      |   |    |
| 26b | If other source of drinking water, specify                                       | Free text                                                                                                    |      |   |    |
| 27  | What kind of toilet facility do members of your household usually use? (observe) | Flush Toilet                                                                                                 | 1    |   |    |
|     |                                                                                  | Ventilated improved Pit Latrine                                                                              | 2    |   |    |
|     |                                                                                  | Traditional Pit Latrine                                                                                      | 3    |   |    |
|     |                                                                                  | None/bush                                                                                                    | 4    |   |    |
|     |                                                                                  | Other, Specify _____                                                                                         |      |   |    |
| 27b | If other kind of toilet, specify                                                 | Free text                                                                                                    |      |   |    |
| 28  | What type of fuel does your household mainly use for cooking?                    | Firewood/straw                                                                                               | 1    |   |    |
|     |                                                                                  | Charcoal                                                                                                     | 2    |   |    |
|     |                                                                                  | LPG/Natural gas                                                                                              | 3    |   |    |
|     |                                                                                  | Biogas                                                                                                       | 4    |   |    |
|     |                                                                                  | Electricity                                                                                                  | 6    |   |    |
|     |                                                                                  | Paraffin                                                                                                     | 7    |   |    |
|     |                                                                                  | Other, Specify _____                                                                                         |      |   |    |
| 28b | If other fuel, specify                                                           | Free text                                                                                                    |      |   |    |
| 29  | Does the household own land used for farming?                                    | Yes                                                                                                          | 1    |   |    |
|     |                                                                                  | No                                                                                                           | 0    | 0 | 30 |
| 30  | If yes, indicate approximate size in acres >><br>if don't know write 9999        | <div style="border: 1px solid black; width: 250px; height: 40px; margin-bottom: 5px;"></div> Acres           | ____ |   |    |
| 31  | What time did you go inside your house last night?                               | <div style="border: 1px solid black; width: 250px; height: 20px; margin-bottom: 5px;"></div> Before 18 hours | 1    |   |    |

|    |                                                                                  |                   |      |
|----|----------------------------------------------------------------------------------|-------------------|------|
|    |                                                                                  | 18 -19 H          | 2    |
|    |                                                                                  | 19 -20 H          | 3    |
|    |                                                                                  | 20 -21 H          | 4    |
|    |                                                                                  | 21 -22 H          | 5    |
|    |                                                                                  | After 22 H        | 6    |
|    |                                                                                  | Don't know        | 9999 |
| 32 | What time was the door closed for the night last night?                          | Before 18 hours   | 1    |
|    |                                                                                  | 20 -19 H          | 2    |
|    |                                                                                  | 21 - 20 H         | 3    |
|    |                                                                                  | 22 -21 H          | 4    |
|    |                                                                                  | 23 -22 H          | 5    |
|    |                                                                                  | After 22 H        | 6    |
| 36 | My family is at risk of malaria all-year round                                   | Strongly Disagree | 1    |
|    |                                                                                  | Disagree          | 2    |
|    |                                                                                  | Neither           | 3    |
|    |                                                                                  | Agree             | 4    |
|    |                                                                                  | Strongly Agree    | 5    |
| 37 | It's more important to me to use nets in the rainy season than in the dry season | Strongly Disagree | 6    |
|    |                                                                                  | Disagree          | 7    |
|    |                                                                                  | Neither           | 8    |
|    |                                                                                  | Agree             | 9    |
|    |                                                                                  | Strongly Agree    | 10   |
| 38 | It makes me worried when one of my children might have malaria                   | Strongly Disagree | 11   |
|    |                                                                                  | Disagree          | 12   |
|    |                                                                                  | Neither           | 13   |
|    |                                                                                  | Agree             | 14   |

|    |                                                                                                                     |                       |              |     |
|----|---------------------------------------------------------------------------------------------------------------------|-----------------------|--------------|-----|
|    |                                                                                                                     | Strongly Agree        | 15           |     |
| 39 | It makes me worried when me or my spouse get malaria                                                                | Strongly Disagree     | 16           |     |
|    |                                                                                                                     | Disagree              | 17           |     |
|    |                                                                                                                     | Neither               | 18           |     |
|    |                                                                                                                     | Agree                 | 19           |     |
|    |                                                                                                                     | Strongly Agree        | 20           |     |
| 40 | I don't worry much about malaria these days                                                                         | Strongly Disagree     | 21           |     |
|    |                                                                                                                     | Disagree              | 22           |     |
|    |                                                                                                                     | Neither               | 23           |     |
|    |                                                                                                                     | Agree                 | 24           |     |
|    |                                                                                                                     | Strongly Agree        | 25           |     |
| 41 | The last time someone in this household was diagnosed with malaria was:                                             | In the last 3 months  | 1            |     |
|    |                                                                                                                     | In the last 6 months  | 2            |     |
|    |                                                                                                                     | In the last 12 months | 3            |     |
|    |                                                                                                                     | Over 12 months ago    | 4            |     |
|    |                                                                                                                     | Don't Know            | 9999         |     |
| 42 | The last time someone I know died of malaria was:                                                                   | In the last 3 months  | 1            |     |
|    |                                                                                                                     | In the last 6 months  | 2            |     |
|    |                                                                                                                     | In the last 12 months | 3            |     |
|    |                                                                                                                     | Over 12 months ago    | 4            |     |
|    |                                                                                                                     | Don't Know            | 9999         |     |
| 43 | How many mosquito nets that can be used for sleeping does your household have? (Probe for any nets currently not in | Number Nets           | Net >0       | 44  |
|    |                                                                                                                     |                       | Net=0 or DNK | ### |
|    |                                                                                                                     | Don't know            | 98           |     |

|                                  |                                                                                            |                                             |                                      |
|----------------------------------|--------------------------------------------------------------------------------------------|---------------------------------------------|--------------------------------------|
|                                  | use, stored, saved, still in packaging etc)                                                |                                             |                                      |
| Questions on each net Hole index |                                                                                            |                                             |                                      |
| No.                              | Question                                                                                   | Options                                     |                                      |
|                                  | Mosquito net number                                                                        | _ _ _                                       |                                      |
| 44                               | Is the net an LLIN?                                                                        | P8X01MS-LNBE                                | 1                                    |
|                                  |                                                                                            | 58147523                                    | 2                                    |
|                                  |                                                                                            | 58574747                                    | 3                                    |
|                                  |                                                                                            | 1.CL88190.1.BL.08.18                        | 4                                    |
|                                  |                                                                                            | Olyset Net                                  | 5                                    |
|                                  |                                                                                            | Permanet 2                                  | 6                                    |
|                                  |                                                                                            | Olyset plus                                 | 7                                    |
|                                  |                                                                                            | Other LLIN                                  | 8                                    |
|                                  |                                                                                            | No it is not a LLIN                         | 9                                    |
|                                  |                                                                                            | Don't know                                  | 9999                                 |
| 45                               | How does the loop look like? (observe)                                                     | White piece of netting                      | 1                                    |
|                                  |                                                                                            | Blue piece of netting                       | 2                                    |
|                                  |                                                                                            | Blue ribbon                                 | 3                                    |
|                                  |                                                                                            | Pink ribbon                                 | 4                                    |
| 46                               | How many month ago was this net obtained?<br><br>Enter "00" if less than one month         | <div> <div></div> <div></div> </div> Months | <div> <div></div> <div></div> </div> |
|                                  |                                                                                            | Don't remember                              | 9999                                 |
| 1                                | How many month ago did you start to use this net?<br><br>Enter "00" if less than one month | <div> <div></div> <div></div> </div> Months | <div> <div></div> <div></div> </div> |
|                                  |                                                                                            | Don't remember                              | 9999                                 |

|     |                                                                                |                                    |    |
|-----|--------------------------------------------------------------------------------|------------------------------------|----|
| 47  | Was the net observed by the FW                                                 | Yes                                | 1  |
|     |                                                                                | No                                 | 0  |
|     |                                                                                | Yes goto                           | 48 |
| 48  | How is the net found? (observe)                                                | Hanging loose over sleeping place  | 1  |
|     |                                                                                | Hanging tied in knot               | 2  |
|     |                                                                                | Hanging folded                     | 3  |
|     |                                                                                | Visible but not hung up            | 4  |
|     |                                                                                | Store away                         | 5  |
| 49  | What type of bed is the net hanging over? (observe)                            | Wooden or iron bedframe (improved) | 1  |
|     |                                                                                | Stick bedframe                     | 2  |
|     |                                                                                | No bedframe                        | 3  |
|     |                                                                                | Other, specify                     | 4  |
| 49b | If the response to "what type of bed is the net hanging over" is other specify | Text                               |    |
| 50  | What type of mattress/sleeping material is used with this net? (observe)       | No mattress                        | 1  |
|     |                                                                                | Reed mat (mkeka)                   | 2  |
|     |                                                                                | Clothes/other net/material         | 3  |
|     |                                                                                | Foam/spring mattress               | 4  |
|     |                                                                                | Hammock                            | 5  |
|     |                                                                                | Other, specify                     | 6  |
| 50b | If the response to "what type of bed is the net hanging over" is other specify | Text                               |    |
| 51  | Where was this net obtained                                                    | PAMVERC Project campaign           | 1  |
|     |                                                                                | School Net Program                 | 2  |
|     |                                                                                | Antenatal clinic when pregnant     | 3  |
|     |                                                                                | Universal campaign 2015            | 4  |
|     |                                                                                | Other faith-based programme or NGO | 5  |

|    |                                                                                                                                  |                                        |      |
|----|----------------------------------------------------------------------------------------------------------------------------------|----------------------------------------|------|
|    |                                                                                                                                  | Purchased full price                   | 6    |
|    |                                                                                                                                  | Received for free by friend/family     | 7    |
|    |                                                                                                                                  | Don't Know                             | 9999 |
| 52 | How many nights has this net been used in the last week (the last 7 days)?                                                       | Every night (7 nights)                 | 1    |
|    |                                                                                                                                  | Most nights (5-6)                      | 2    |
|    |                                                                                                                                  | Some nights (1-4)                      | 3    |
|    |                                                                                                                                  | Not used last week                     | 4    |
|    |                                                                                                                                  | Net is not used at all                 | 5    |
|    |                                                                                                                                  | Don't know                             | 9999 |
|    |                                                                                                                                  | if net not used last week or at all go |      |
| 53 | Was this net used by any person last night?                                                                                      | Yes                                    | 1    |
|    |                                                                                                                                  | No                                     | 0    |
|    |                                                                                                                                  | Don't Know                             | 9999 |
|    |                                                                                                                                  | No goto                                | 57   |
| 54 | Who used this net last night?<br><br>>> probe for any additional person using this net last night and enter line number from Q01 | Resident number of users (Q01)         |      |
|    |                                                                                                                                  | ____   ____                            | 1    |
|    |                                                                                                                                  | ____   ____                            | 2    |
|    |                                                                                                                                  | ____   ____                            | 3    |
|    |                                                                                                                                  | ____   ____                            | 4    |
|    |                                                                                                                                  | ____   ____                            | 5    |
|    |                                                                                                                                  | ____   ____                            | 6    |
| 56 | How long has the net been in use?                                                                                                | 1 week or less                         | 1    |
|    |                                                                                                                                  | 1 month or less                        | 2    |
|    |                                                                                                                                  | 1 to 3 months                          | 3    |
|    |                                                                                                                                  | More than 3 months                     | 4    |
|    |                                                                                                                                  | Don't know                             | 9999 |

|     |                                                                 |                                  |      |
|-----|-----------------------------------------------------------------|----------------------------------|------|
| 57  | Why were the nets not used                                      | I can't use it answer            |      |
|     |                                                                 | No enough space                  | 1    |
|     |                                                                 | No sleeping place to cover       | 2    |
|     |                                                                 | Being washed                     | 3    |
|     |                                                                 | Usual user(s) did not sleep here | 4    |
|     |                                                                 | Don't want to use it answers     |      |
|     |                                                                 | No mosquitoes now                | 5    |
|     |                                                                 | Too hot                          | 6    |
|     |                                                                 | Net too old or torn              | 7    |
|     |                                                                 | Net too dirty                    | 8    |
|     |                                                                 | Presence of bedbugs              | 9    |
|     |                                                                 | Reserved for future use          | 10   |
|     |                                                                 | Net not hung                     | 11   |
|     |                                                                 | Used for other purpose           | 12   |
|     |                                                                 | Don't know                       | 9999 |
|     |                                                                 | Other                            | 13   |
|     |                                                                 | If Other goto                    | 57b  |
| 57b | If, other specify                                               | Text                             |      |
| 58  | How does this current net compare to the net you had previously | This net is better               | 1    |
|     |                                                                 | This net is worse                | 2    |
|     |                                                                 | The net is the same              | 3    |
|     |                                                                 | Don't know                       | 9999 |
| 59  | If this net is better, why?                                     | Less/fewer can penetrate net     | 1    |
|     |                                                                 | The net is soft (polyester)      | 2    |
|     |                                                                 | Does not acquire holes easily    | 3    |
|     |                                                                 | Other                            | 4    |
|     |                                                                 | Don't know                       | 9999 |

|     |                                                                   |                                           |      |
|-----|-------------------------------------------------------------------|-------------------------------------------|------|
| 60  | If this net is worse, why?                                        | Much mosquitoes penetrate through the net | 1    |
|     |                                                                   | The net is smaller                        | 2    |
|     |                                                                   | The net is hard (polyethylene)            | 3    |
|     |                                                                   | Net acquire holes easily                  | 4    |
|     |                                                                   | The net has a bad odor                    | 5    |
|     |                                                                   | This net causes some side effects         | 6    |
|     |                                                                   | Other                                     | 7    |
|     |                                                                   | Don't know                                | 9999 |
| 61  | Do you think this net is still protective?                        | Yes                                       | 1    |
|     |                                                                   | No                                        | 2    |
|     |                                                                   | Don't know                                | 9999 |
| 62  | During which periods of the year is this net used to sleep under? | All year                                  | 1    |
|     |                                                                   | Only the rainy season                     | 2    |
|     |                                                                   | Only the dry season                       | 3    |
|     |                                                                   | Don't know                                | 9999 |
| 63  | Do you tuck the net in at night?.                                 | Yes                                       | 1    |
|     |                                                                   | No                                        | 2    |
|     |                                                                   | Don't know                                | 9999 |
| 64  | Has the net ever been washed?                                     | Yes                                       | 1    |
|     |                                                                   | No                                        | 2    |
|     |                                                                   | Don't know                                | 9999 |
|     |                                                                   | Yes goto                                  | 66   |
| 65  | How many times was the net being washed                           | 1-5 time                                  | 1    |
|     |                                                                   | 5-10 times                                | 2    |
|     |                                                                   | 10-15 times                               | 3    |
|     |                                                                   | 15-20 times                               | 4    |
| 65b | If others specify                                                 | Text                                      |      |



|    |                                                                                   |                                                                         |                                                                                                                                                                                                                                   |
|----|-----------------------------------------------------------------------------------|-------------------------------------------------------------------------|-----------------------------------------------------------------------------------------------------------------------------------------------------------------------------------------------------------------------------------|
| 66 | When was the last time you washed the net                                         | less than 1 week ago                                                    | 1                                                                                                                                                                                                                                 |
|    |                                                                                   | 1 week to 1 month ago                                                   | 2                                                                                                                                                                                                                                 |
|    |                                                                                   | 1-3 months ago                                                          | 3                                                                                                                                                                                                                                 |
|    |                                                                                   | 3-6 months ago                                                          | 4                                                                                                                                                                                                                                 |
|    |                                                                                   | > 6 months ago                                                          | 5                                                                                                                                                                                                                                 |
|    |                                                                                   | Don't know                                                              | 9999                                                                                                                                                                                                                              |
| 67 | Do you use an open flame for cooking, heating or lighting where the net is found? | Yes                                                                     | 1                                                                                                                                                                                                                                 |
|    |                                                                                   | No                                                                      | 0                                                                                                                                                                                                                                 |
|    |                                                                                   | Don't Know                                                              | 9999                                                                                                                                                                                                                              |
|    |                                                                                   | Yes goto                                                                | 68                                                                                                                                                                                                                                |
| 68 | If yes which type of open flame are you using                                     | Wood fire                                                               | 1                                                                                                                                                                                                                                 |
|    |                                                                                   | Charcoal fire                                                           | 2                                                                                                                                                                                                                                 |
|    |                                                                                   | Wax candle                                                              | 3                                                                                                                                                                                                                                 |
|    |                                                                                   | Oil lamp with a glass                                                   | 4                                                                                                                                                                                                                                 |
|    |                                                                                   | Oil lamp without a glass                                                | 5                                                                                                                                                                                                                                 |
|    |                                                                                   | Other, specify                                                          | 6                                                                                                                                                                                                                                 |
| 69 | Was the net selected to count the hole                                            | Yes                                                                     | 1                                                                                                                                                                                                                                 |
|    |                                                                                   | No                                                                      | 0                                                                                                                                                                                                                                 |
|    |                                                                                   | No GO TO NEXT NET or Resident section                                   |                                                                                                                                                                                                                                   |
| 70 | Does the net has any hole                                                         | Yes                                                                     | 1                                                                                                                                                                                                                                 |
|    |                                                                                   | No                                                                      | 0                                                                                                                                                                                                                                 |
|    |                                                                                   | No GO TO NEXT NET or Resident section2 or mosquito number in second day |                                                                                                                                                                                                                                   |
| 72 | ZONE 1 (TOP PANNEL)<br>Number of holes size 1                                     | Not larger than a finger                                                | <div style="border: 1px solid black; display: inline-block; width: 30px; height: 30px; position: relative;"> <div style="position: absolute; top: 0; right: 0; width: 10px; height: 10px; background-color: black;"></div> </div> |

|    |                                               |                                                   |                                                                                       |
|----|-----------------------------------------------|---------------------------------------------------|---------------------------------------------------------------------------------------|
|    |                                               |                                                   |                                                                                       |
| 73 | ZONE 1 (TOP PANNEL)<br>Number of holes size 2 | Larger than finger but not larger than hand width |    |
| 74 | ZONE 1 (TOP PANNEL)<br>Number of holes size 3 | Larger than hand width but smaller than head      |    |
| 75 | ZONE 1 (TOP PANNEL)<br>Number of holes size 4 | Larger than head                                  |    |
| 76 | ZONE 2 Number of holes size 1                 | Not larger than a finger                          |    |
| 77 | ZONE 2 Number of holes size 2                 | Larger than finger but not larger than hand width |    |
| 78 | ZONE 2 Number of holes size 3                 | Larger than hand width but smaller than head      |  |
| 79 | ZONE 2 Number of holes size 4                 | Larger than head                                  |  |

|    |                                               |                                                   |                                                                                       |
|----|-----------------------------------------------|---------------------------------------------------|---------------------------------------------------------------------------------------|
|    |                                               |                                                   |                                                                                       |
| 80 | ZONE 3 Number of holes size 1                 | Not larger than a finger                          |    |
| 81 | ZONE 3 Number of holes size 2                 | Larger than finger but not larger than hand width |    |
| 82 | ZONE 3 Number of holes size 3                 | Larger than hand width but smaller than head      |    |
| 83 | ZONE 3 Number of holes size 4                 | Larger than head                                  |    |
| 84 | ZONE 4 (Bottom pannel) Number of holes size 1 | Not larger than a finger                          |    |
| 85 | ZONE 4 (Bottom pannel) Number of holes size 2 | Larger than finger but not larger than hand width |  |
| 86 | ZONE 4 (Bottom pannel) Number of holes size 3 | Larger than hand width but smaller than head      |  |

|    |                                                  |                                                   |                                   |
|----|--------------------------------------------------|---------------------------------------------------|-----------------------------------|
|    |                                                  |                                                   |                                   |
| 87 | ZONE 4 (Bottom pannel)<br>Number of holes size 4 | Larger than head                                  | <div><div></div><div></div></div> |
| 88 | ROOF Number of holes size 1                      | Not larger than a finger                          | <div><div></div><div></div></div> |
| 89 | ROOF Number of holes size 2                      | Larger than finger but not larger than hand width | <div><div></div><div></div></div> |
| 90 | ROOF Number of holes size 3                      | Larger than hand width but smaller than head      | <div><div></div><div></div></div> |
| 91 | ROOF Number of holes size 4                      | Larger than head                                  | <div><div></div><div></div></div> |
| 92 | What types of hole are observed?                 | Horizontal tears at bottom                        | 1                                 |
|    |                                                  | Holes at hanging points                           | 2                                 |
|    |                                                  | Open seams                                        | 3                                 |
|    |                                                  | Burn holes                                        | 4                                 |
|    |                                                  | Holes from rodents                                | 5                                 |
|    |                                                  | Whole section missing                             | 6                                 |
| 93 | Number of holes repaired                         | Total                                             | <div><div></div><div></div></div> |

|     |                                                                            |                                      |      |
|-----|----------------------------------------------------------------------------|--------------------------------------|------|
|     |                                                                            |                                      |      |
| 94  | Have you tried to fix any holes in the net                                 | Yes                                  | 1    |
|     |                                                                            | No                                   | 2    |
|     |                                                                            | Don't know                           | 9999 |
|     |                                                                            | IF No GO TO                          | 96   |
| 95  | How did you repair the hole?                                               | Stitched                             | 1    |
|     |                                                                            | Knotted/tied                         | 2    |
|     |                                                                            | Patched                              | 3    |
|     |                                                                            | Other way, specify                   | 4    |
| 95b | If the response to "How did you repair the hole" is other way specify      | Text                                 |      |
| 96  | If not, what was the main reason?                                          | Too busy/no time                     | 1    |
|     |                                                                            | Not necessary, the net is still good | 2    |
|     |                                                                            | Don't know how to fix                | 3    |
|     |                                                                            | Too damaged to fix                   | 4    |
|     |                                                                            | Other, specify                       | 5    |
| 96b | If the response to "If not, what was the main reason" is other way specify | Text                                 |      |
